# Supplementary material
Source: PubMed Central journal article supplement (PMC2981222)
Supplement: supp_192_23_6261__1.pdf [file supp_192_23_6261__1.pdf]

FliZ Regulates Expression of the SPI1 Invasion Locus by Controlling HilD Protein Activity in *Salmonella enterica* serovar Typhimurium

Jessica E. Cott Chubiz, Yekaterina A. Golubeva, Dongxia Lin, Lucas D. Miller, and James M. Slauch

University of Illinois

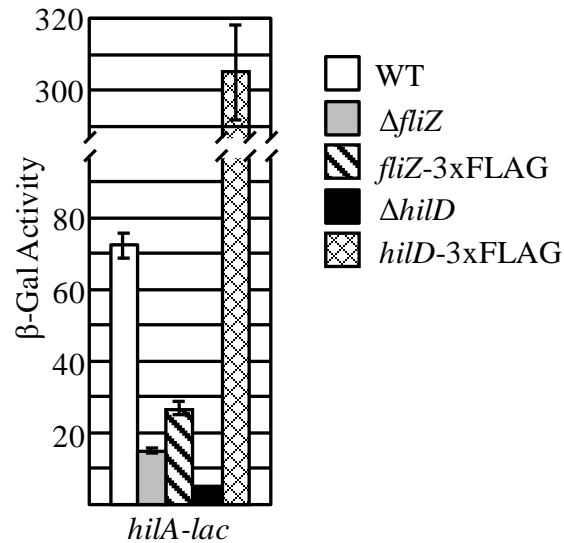

**Figure S1.**  $\beta$ -galactosidase activity in strains containing *hilA-lacZ* transcriptional fusions and the indicated deletions or FLAG-tagged constructs in their normal chromosomal location. Note that insertions downstream of *hilD* cause increased expression, likely due to affects on Hns-mediated silencing. Strains were grown in SPI1 inducing conditions.  $\beta$ -galactosidase activity units are defined as ( $\mu\text{mol}$  of ONP formed  $\text{min}^{-1}$ )  $\times 10^3 / (\text{OD}_{600} \times \text{ml}$  of cell suspension) and are reported as mean  $\pm$  standard deviation (n=4).
